# Supplementary material for: The Examination of the Role of Rice Lysophosphatidic Acid Acyltransferase 2 in Response to Salt and Drought Stresses
Source: MDPI journal article supplement (doi:10.3390/ijms23179796), 2022-08-29
Supplement: s1 [file s1]

**Supplementary Table S1.** Primers used in this study.

| Primer name     | Primer sequence (5'→3')      | Primer Specification               |
|-----------------|------------------------------|------------------------------------|
| FP              | TTATAGGTGCCCCAAAACCC         | <i>lpat2</i> mutant identification |
| RP              | TTACAGTTTCGCGCAGTGAC         | <i>lpat2</i> mutant identification |
| T-border primer | ATTCCAGATCCCCCGAATTA         | <i>lpat2</i> mutant identification |
| COMF            | GAATTCGCGAAAAACGCACCGTATAG   | Promoter for LPAT2 COM             |
| COMR            | GGTACCATCTTTCTTGACACGGTTC    | Promoter for LPAT2 COM             |
| LPAT2 FK        | GGTACCATGGCGGTCCCACTCGTGC    | CDS for <i>LPAT2</i> COM           |
| LPAT2 Rb        | GGATCCATCTTTCTTGACACGGTTC    | CDS for <i>LPAT2</i> COM           |
| Pcambia-F       | TAGCCAATACGCAAACCGC          | COM identification                 |
| OsLp2           | CTTCAGTAACCCTTGGGCATAG       | COM identification                 |
| LPAT2-ProF      | GAATTCATGGCGGTCCCACTCGTGC    | LPAT2 protein expression           |
| LPAT2-ProR      | CTCGAGATCTTTCTTGACACGGTTCC   | LPAT2 protein expression           |
| LPAT2-GFPF      | GGGGTACCATGGCGGTCCCACTCGTGC  | LPAT2-GFP localization             |
| LPAT2-GFPR      | GCTCTAGAATCTTTCTTGACACGGTTCC | LPAT2-GFP localization             |
| LPAT2-RTF       | AGTGAGATGCCAAAGTCA           | Real time PCR                      |
| LPAT2-RTR       | ACAGGAGTTGAGTCCATAGG         | Real time PCR                      |
| β-actin F       | TGCTATGTACGTCGCCATCCAG       | Real time PCR                      |
| β-actin R       | AATGAGTAACCACGCTCCGTCA       | Real time PCR                      |

|            |                                                                                             |      |
|------------|---------------------------------------------------------------------------------------------|------|
| ScLPAT0231 | : MSVIGR-----                                                                               | : 6  |
| AtLPAT1    | : MDVASARSISSHPSYGKPICSSQSSLRIRSRDKVCCFGRISNGMTSFTTSLHAVPSEKFMGETRRTGIQWSNRSRLRHPYRFLDKKSPR | : 90 |
| AtLPAT2    | : M-----                                                                                    | : 1  |
| AtLPAT3    | : M-----                                                                                    | : 1  |
| AtLPAT4    | : M-----                                                                                    | : 1  |
| AtLPAT5    | : M-----                                                                                    | : 1  |
| OsLPAT1    | : MGTLLRPRPLAHAAGADATPSTAHAVV-----VSGG-----RGRGVCEQPHRVRRRPGPQ                              | : 51 |
| OsLPAT2    | : M-----                                                                                    | : 1  |
| OsLPAT3    | : MDTV-----                                                                                 | : 4  |
| OsLPAT4    | : M-----                                                                                    | : 1  |
| OsLPAT5    | : M-----                                                                                    | : 1  |

  

|            |                                                                                             |       |
|------------|---------------------------------------------------------------------------------------------|-------|
| ScLPAT0231 | : -----FLYYLRSVLVVALAGCGFYGVIAS-----TL-----CTLIGKQHLAQWITAR                                 | : 49  |
| AtLPAT1    | : -----SSQLARDITVRADLS--GAAT-PDSSFPEPEIKLSSRLRGFFCCVVAGISATFLVLM-----TLGHPPVL-----LFDPPYRRK | : 161 |
| AtLPAT2    | : -----VIAAAVIVPLGLFFISGLAVNLFOAVCY-----VLRPL-----SKNTYRKI                                  | : 44  |
| AtLPAT3    | : -----KIPAAVIFIPVGLFLISGLIVNIIQVFF-----TVRPF-----SRSLYRKI                                  | : 45  |
| AtLPAT4    | : -----EVCGLKSDNLKNRPLTPRILRGIMLLVFLSTAFMFILYFAPIAAGLR-L-----LSVQQRK                        | : 61  |
| AtLPAT5    | : -----EKKSVPNSDKLSLRVLRLGICLMVLVSTAFMMILFWGFLSAVLR-L-----FSIRYSRK                          | : 56  |
| OsLPAT1    | : VAVATASWRRRRRETIVRSDFAAAGGAATMGDSPQALSDIDVSRVRGCFYAVTAVAAIFLVAM-----VVVHPLVL-----LFDRYRRR | : 131 |
| OsLPAT2    | : -----AVVVVSGGIINAAVSI-----RKSRYRKI                                                        | : 26  |
| OsLPAT3    | : VAAATTGSRRLWPARRQAAAYLAAAGGGDDGWAACAASAVRIV--VCFVSMATTAAWAVML-----LLPWPCARIRQGNLYGHVTGR   | : 88  |
| OsLPAT4    | : --MNGSNGSQGYHVG--KQVQSVVPSIQNNGPRHRPLTLRRCRGLCLVIMPLTAEMMVYLSPTVTFILIR-L-----FSVHYSRK     | : 79  |
| OsLPAT5    | : ---NGSSGSQGHNVNGGQKVKQHASPLTLNNGSKHRPLTPRRCRGACVVIILSTAFTLVFIAPITTFILVR-L-----VSVHYSRK    | : 80  |

  

|            |                                                                                             |       |
|------------|---------------------------------------------------------------------------------------------|-------|
| ScLPAT0231 | : CFYHVMKLMIGI-----DVK-----VGEEN-----AKKPYIMIANHOSLIDIFMLGRIFPP-----GCTVTAKKSLKYVEFLGWFMAIS | : 120 |
| AtLPAT1    | : FHHFIKWLASI--SIYF-YKIN-----EGLENLPS-SDTPAVVSNHOSLIDITLLSLGK-----SPKFTSKTGIFVPIIGWAMSM     | : 239 |
| AtLPAT2    | : NRVVAETLWLEVMIVDWAGVKIQVFADNETFNRMGKEHAIIVCNHRSIDIDLVGWILAQRSGLGSALA-MKKSSKFLPVIIGWSMWF   | : 134 |
| AtLPAT3    | : NKNVAELLWLQIWLFDWACIKINLYVDAETELIGKEHAIIVSNHRSIDIDLIGWVMAQRVGLGSSLA-MKKEAKYLPVIIGWSMWF    | : 135 |
| AtLPAT4    | : VVSLIFGLWLA--WPYLEETVNGTTVFSGDIIPV--EKRVLLTANHRTVDWMYLWDLALRKGCLGYIKYIKSSIMKLPPIFGWGFHVL  | : 148 |
| AtLPAT5    | : CVSFFFGSWLA--WPFLFEKINKTKVFSGDKVPC--EDRVLLTANHRTVDWMYFWDALRKGQIGNIKYIKSSIMKLPPIFGWAFHLF   | : 143 |
| OsLPAT1    | : AQHYIAKIWATL--TISM-YKLD-----EGMENLPP-NSSPAVYANHOSLIDITLLTGR-----CFKFTSKTSIFMFPPIIGWAMYLL  | : 209 |
| OsLPAT2    | : NRAWV-----W-VDWAGVK--HADDTYKA--MGNHAIIVSNHRSIDIDW-IGWI--ARSGC--GSTAMKSSK--VIGWSMW--       | : 92  |
| OsLPAT3    | : MLMWILG-----NPIK-----EGMEN-----NTRGELFCNHASLIDIFLVMWAPT-----GTVGAKKEIIWYPIFCQLYVLA        | : 154 |
| OsLPAT4    | : STCFLFGMWLA--WPFLFEKINKTKVFSGETVPP--KERVLLFANHRTVDWMYLWDLALRKGRLQCIKYIKSSIMKLPPIFNFAFHII  | : 166 |
| OsLPAT5    | : ATSVLFGMWLSI--WPFLFEKINKTNVFSGESVLP--KKRVLLFANHRTVDWMYLWDLALRKGYLGYIKYIKSSIMKLPPIFNFAFHIF | : 167 |

  

|            |                                                                                           |       |
|------------|-------------------------------------------------------------------------------------------|-------|
| ScLPAT0231 | : GTYFDRSKRQEAIDTNKGLENVKKNKRALW--VPECTRSYSELTMLPFKKGAFLAQGKIPIVEVVSNTSTLVSPKYGVFN--      | : 205 |
| AtLPAT1    | : GVVPIKRM DPRSQVDCIKRCMELLKKGASVF--EPECTRSKDG-LG--SFKKGAFVAKTGAVVPIITLMTGTGIMPTGSEGILN-- | : 322 |
| AtLPAT2    | : EYLFERNWAKDE-STKSGLQRLSDFFRPFWLALVECTRFTEAL--KAAQEYASSELPIPRNVILPRTGFVSAVSNMRSFV        | : 217 |
| AtLPAT3    | : DYLFERNWAKDE-NTKAGFKRLEDFFMTFWLALVECTRFTEAL--EAAQEYASIRSLSPRNVLIPRTGFVSAVSEIRSFV        | : 218 |
| AtLPAT4    | : EFIPVERKREVDE-PVQLQLSSFKDPQEPFLALVECTDFTEEC--KRSQKFAEVGLEALSNVLIPKTGFVGVCEVLHNSL        | : 231 |
| AtLPAT5    | : EFIPVERREWEVDE-ANRQIVSSFKDPRDALWALVECTDYTEAC--QRSKKFAENGLEILNNVLIPRTGFVSVCLQELSCSL      | : 226 |
| OsLPAT1    | : GVVPIRMRDSRSQLDCKRCVDLVKKGASVF--EPECTRSKDG-LG--AFKRGAFSVAKTGAVIPITLGTGLMPSGMEGILN--     | : 292 |
| OsLPAT2    | : ---AYRSWAKDK-----TKWGRKDRWAV-----GTRTAKAAY-----ASGARNVIT--RTG-VSAVTIMRDV--              | : 144 |
| OsLPAT3    | : NHRIRHRSNPAAAIESKEVARAVTKNNLSLI--LPPDTRSKTG-LL--PFKKGFVHTALQTRPIVEMVVTGTHLAWRKNSLRVR--  | : 237 |
| OsLPAT4    | : EFIPVERKWEVDE-PLRSRLSELKNPKDPLWALVECTDYTEKC--IKSQEYAKEHGLEILNNVLIPKTGFHCCLOELRDSM       | : 249 |
| OsLPAT5    | : EFIPVERKWEIDE-AIQNKLSAFKDPDRPLWALVECTDYTEKC--IKSQEYASEHGLEILNNVLIPKTGFHCCLOELKSSL       | : 250 |

  

|            |                                                                                    |       |
|------------|------------------------------------------------------------------------------------|-------|
| ScLPAT0231 | : -----RGCMIVRILK-----LISTENLTCKDIGEFAEKVDMQVDTLKEIGYSPAINDTTLPPQAIIEY             | : 263 |
| AtLPAT1    | : -----HGNVRVLIHK-----BIHGSKA-----DVLCEASAKIAESMDL-----                            | : 356 |
| AtLPAT2    | : PAIYDMTIVTIKTPSPPTMLRLFKGQPSVVMVHIKCHSKMDLESDDAIAQWCRDQF--VADALLDKHIAADTFPG----- | : 292 |
| AtLPAT3    | : PAIYDCTLTVHNNQPTPTLLRMFSGQSSEINLQMRHKMSELDETDDGIAQWCQDLF--ITDAQLEKYFTKDVFS-----  | : 293 |
| AtLPAT4    | : DAVYDLTIAYKPRCPS-FMDNVFGTDPSEVHHVRRVLLKEIANEAESSAWLMDSF--KLQKLLSDFNAQGFKN--      | : 305 |
| AtLPAT5    | : DAVYDVTIGYKTRCPS-FLDNVYGIEPSEVHHIRRLNLTQINQEKDINAWLMNTE--QLDQLLNDFYSGHGFN-----   | : 300 |
| OsLPAT1    | : -----SGSVKLIHH-----IEGND-----EKLCEASAKVIADTLILNGYGVH-----                        | : 332 |
| OsLPAT2    | : -AIYDTTVIKDKST-----MRIKGSVVHVRMKRHAMS--MKSDDVSKWCKDI--VADA--DKHATG-----          | : 200 |
| OsLPAT3    | : -----PAPLVKVLV-----IETDGWVEERIDEYVEMVHSLYADSLPD-----S-----                       | : 277 |
| OsLPAT4    | : DSVCDITIAKHPPT-FMDNVYGIDPSEVHHVHIIQVSDITSEDEVADWLIERF--KLQKLLSDFSALGHGFN-----    | : 323 |
| OsLPAT5    | : DAVYDVTIAKHLPD-FLDIYGTDPSEVHHIRTVKLCDIITSEDEVTDWMIERF--RQDQLLSDFFMQGHFPD-----    | : 324 |

  

|            |                                                                                              |       |
|------------|----------------------------------------------------------------------------------------------|-------|
| ScLPAT0231 | : AALQHDKKVNKKIKN-----EPVPSVISNDVN                                                           | : 291 |
| AtLPAT1    | : -----                                                                                      | : -   |
| AtLPAT2    | : ---QQEQNIGRPIKSLAVLSWACVLTLAGKFLH-WAQLFSSWKGITISALGLGIITLCMQILIRSSQSERSTPAKVVPAPKPKDNHHP   | : 378 |
| AtLPAT3    | : ---LEVHQINRPIKPLIVVLIWLGLVFGGFKLLQ-WLSIVASWKIILLVFVFLVIATITMQILIQSSSESQRSTPAKRPLQEQLISA--- | : 376 |
| AtLPAT4    | : QRPEEELSVLKCIATFAGVISLTVFYLYTLYSHS-CFKVYACLSGTYLT----FATYKQFQSP-GCFREDSCKVKNH-----         | : 378 |
| AtLPAT5    | : EGTEKEFNTKKYLINCLAVIAFTTICTHLTFSSMIWFRIYVSLACVYLT----SATHFNLSRVPLVETAKNSLKLVNK-----        | : 375 |
| OsLPAT1    | : -----                                                                                      | : -   |
| OsLPAT2    | : ---TDIRIGR-----VKSVTWSCYGAVKWT-----TWKGVGTGAVTAVMHVIMSSRSSAKAARNRVKDK-----                 | : 259 |
| OsLPAT3    | : QKPLEPVNTGK-----                                                                           | : 288 |
| OsLPAT4    | : EGTEDDLSTLKCIAFVAVISTTTVLTLYTLFSSV-WFKIFVAFSSAFLT----FATLYSIHLPLQLICSPEAGTHAKKS-----       | : 397 |
| OsLPAT5    | : EGTEGDEVSTPECLANFIAIVSSGTFFLYLSLFSSV-WFKVYVLLSCAYLT----FVTFYSIQPQLICSSEGGTHAKKVL-----      | : 399 |

  

|            |                |       |
|------------|----------------|-------|
| ScLPAT0231 | : THNEGSSVKKMH | : 303 |
| AtLPAT1    | : -----        | : -   |
| AtLPAT2    | : SSSQTETEKEK- | : 389 |
| AtLPAT3    | : -----        | : -   |
| AtLPAT4    | : -----        | : -   |
| AtLPAT5    | : -----        | : -   |
| OsLPAT1    | : -----        | : -   |
| OsLPAT2    | : -----        | : -   |
| OsLPAT3    | : -----KKMS    | : 292 |
| OsLPAT4    | : -----        | : -   |
| OsLPAT5    | : -----        | : -   |

**Supplementary Figure S1.** Sequence alignment and domain structures of LPATs.

Alignment of amino acid sequences of LPATs were analyzed using MAFFT. The identical and similar residues are shaded in black and gray, respectively. The conserved motifs including I, II, III and IV related to acyltransferases are indicated in boxes. Sc, *Saccharomyces cerevisiae*; At, *Arabidopsis thaliana*; Os, *Oryza sativa*.

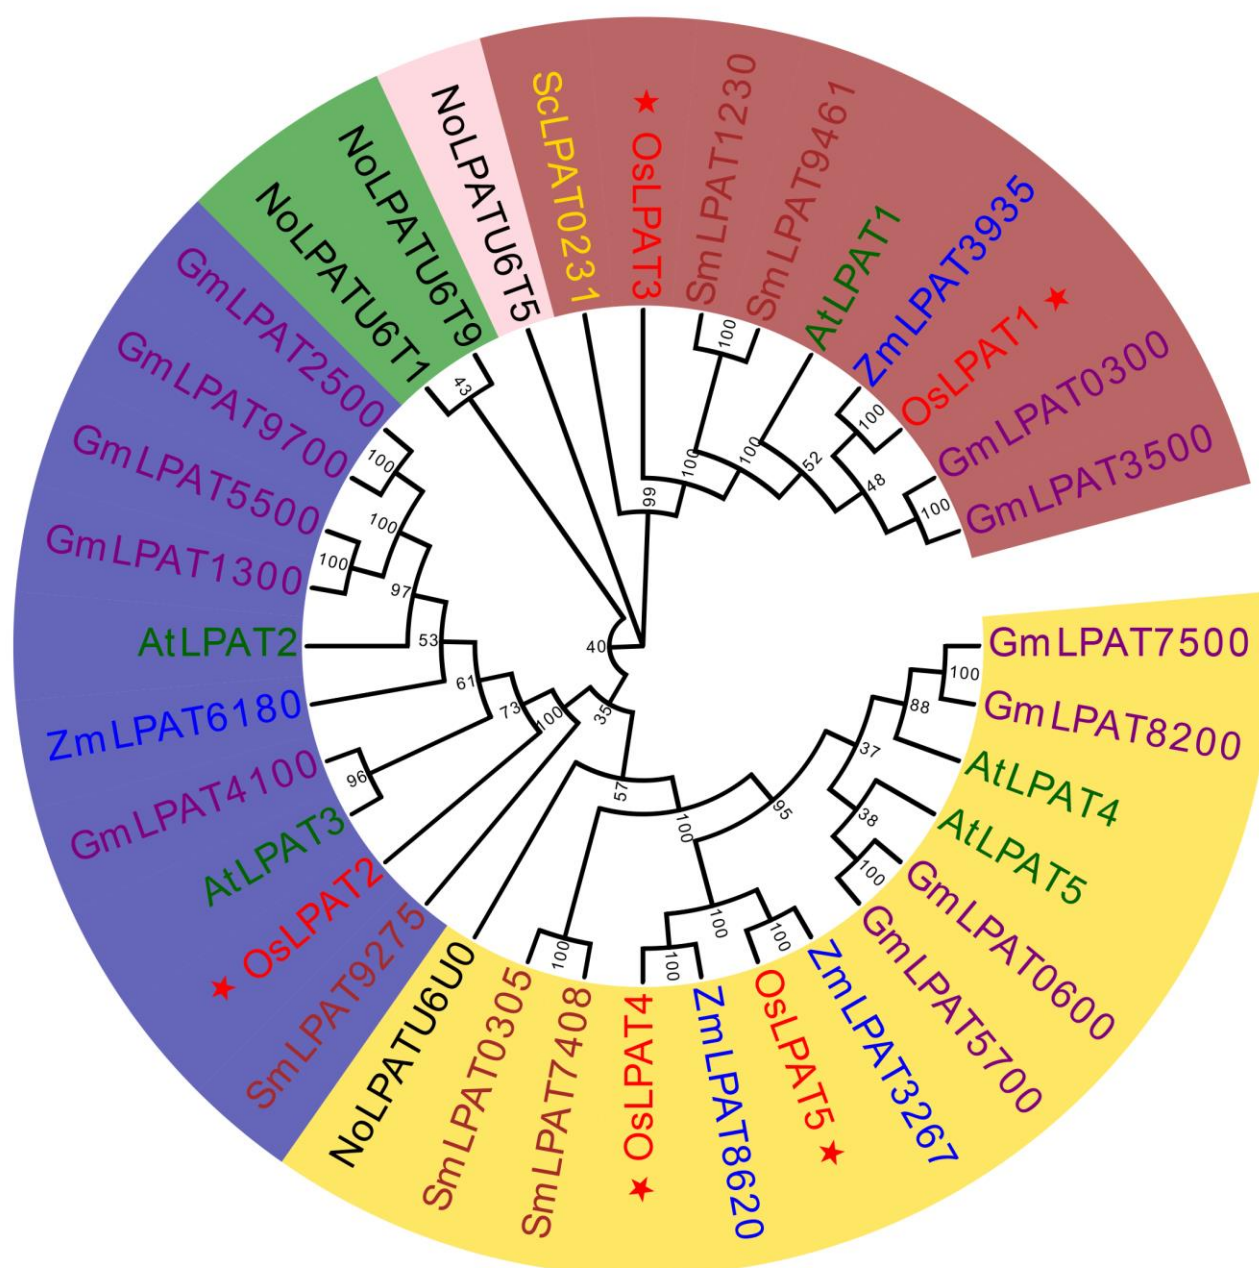

**Supplementary Figure S2.** Phylogenetic analysis of LPAT family in various species.

The amino acid sequences of LPAT orthologous proteins were aligned using the MAFFT software and The phylogenetic tree was constructed through MEGA11 software using neighbor-joining and bootstrap (1000) as default setting. At, *Arabidopsis thaliana*; Gm, *Glycine max*; Os, *Oryza sativa*; Zm, *Zea mays*; Sm, *Selaginella moellendorffii*; No, *Nannochloropsis oceanica*; Sc, *Saccharomyces cerevisiae*. OsLPAT1, Os10g0497100; OsLPAT2, Os11g0637800; OsLPAT3, Os04g0625200; OsLPAT4, Os05g0502200; OsLPAT5, Os01g0782500; AtLPAT1, At4g30580; AtLPAT2, At3g57650; AtLPAT3, At1g51260; AtLPAT4, At1g5020; LPAT5, At4g18850.
